# Supplementary material for: Camera Trapping Reveals Spatiotemporal Partitioning Patterns and Conservation Implications for Two Sympatric Pheasant Species in the Qilian Mountains, Northwestern China
Source: MDPI journal article supplement (doi:10.3390/ani12131657), 2022-06-28
Supplement: s1 [file s1]

## Supplementary Materials

**Table S1.** Detailed information on camera traps layout and monitoring throughout the study period.

| Study area | Landscape types    | Altitude range(m) | Altitude (m) Mean±SD | Number of camera site | Model of infrared camera | Monitoring time range | Camera-days |
|------------|--------------------|-------------------|----------------------|-----------------------|--------------------------|-----------------------|-------------|
| QF         | Scrub-Grassland    | 2400-3000         | 2783±201.21          | 20                    | Ltl 6210                 | 2017-08-2019-08       | 6,267       |
| LCH        | Scrub-Grassland    | 2900-3600         | 3315±168.43          | 20                    | EREAGLE E1B              | 2018-12-2020-08       | 6,158       |
| SDL        | Coniferous forests | 2800-3500         | 3027±176.64          | 20                    | Ltl 6210                 | 2017-08-2019-08       | 11,134      |
| MC         | Scrub-Grassland    | 3000-3800         | 3375±160.17          | 40                    | EREAGLE E1B              | 2018-11-2019-03       | 2,300       |
| XYH        | Coniferous forests | 2500-3300         | 2800±213.82          | 17                    | EREAGLE E1B              | 2017-11-2019-07       | 3,601       |
| HX         | Coniferous forests | 2700-3400         | 3060±171.50          | 20                    | Ltl 6511                 | 2017-08-2019-08       | 9,746       |
| Total      | ——                 | 2400-3800         | 3116±284.61          | 137                   | ——                       | 2017-08-2020-08       | 39,206      |

**Table S2.** Environment variables used for the MaxENT modeling for EP and BP.

| Category           | Variable                               | Units | Symbol   | EP | BP | Source                     |
|--------------------|----------------------------------------|-------|----------|----|----|----------------------------|
| Bioclimatic data   | Annual mean temperature                | °C    | bio1     | —  | Y  | www.worldclim.org/         |
|                    | Mean diurnal range                     | °C    | bio2     | —  | —  | www.worldclim.org          |
|                    | Isothermality                          | °C    | bio3     | —  | —  | www.worldclim.org          |
|                    | Temperature Seasonality                | °C    | bio4     | Y  | —  | www.worldclim.org          |
|                    | Max Temperature of Warmest Month       | °C    | bio5     | Y  | —  | www.worldclim.org/         |
|                    | Min Temperature of Coldest Month       | °C    | bio6     | —  | —  | www.worldclim.org          |
|                    | Annual Temperature Range               | °C    | bio7     | —  | —  | www.worldclim.org          |
|                    | Mean Temperature of Wettest Quarter    | °C    | bio8     | —  | —  | www.worldclim.org          |
|                    | Mean Temperature of Driest Quarter     | °C    | bio9     | —  | —  | www.worldclim.org/         |
|                    | Mean Temperature of Warmest Quarter    | °C    | bio10    | —  | —  | www.worldclim.org          |
|                    | Mean Temperature of Coldest Quarter    | °C    | bio11    | —  | —  | www.worldclim.org          |
|                    | Annual Precipitation                   | mm    | bio12    | —  | Y  | www.worldclim.org          |
|                    | Precipitation of Wettest Month         | mm    | bio13    | —  | —  | www.worldclim.org/         |
|                    | Precipitation of Driest Month          | mm    | bio14    | —  | —  | www.worldclim.org          |
|                    | Precipitation Seasonality              | mm    | bio15    | Y  | —  | www.worldclim.org          |
|                    | Precipitation of Wettest Quarter       | mm    | bio16    | —  | —  | www.worldclim.org          |
|                    | Precipitation of Driest Quarter        | mm    | bio17    | —  | —  | www.worldclim.org          |
|                    | Precipitation of Warmest Quarter       | mm    | bio18    | —  | —  | www.worldclim.org          |
|                    | Precipitation of Coldest Quarter       | mm    | bio19    | Y  | Y  | www.worldclim.org          |
| Vegetation         | Global land cover                      |       | glc      | Y  | Y  | www.globallandcover.com/   |
|                    | Normalized difference vegetation index |       | ndvi     | Y  | Y  | www.resdc.cn/              |
| Topographical data | Altitude above mean sea level          | m     | altitude | Y  | Y  | www.gscloud.cn/            |
|                    | Slope of the terrain                   | °     | slope    | Y  | Y  | Extraction in spatial data |
|                    | Cardinal orientation of the slope      | °     | aspect   | Y  | Y  | Extraction in spatial data |
|                    | Distance to rivers                     | m     | dis_riv  | Y  | Y  | Euclidean distance         |
| Human disturbance  | Distance to settlements                | m     | dis_set  | Y  | Y  | Euclidean distance         |
|                    | Distance to roads                      | m     | dis_roa  | Y  | Y  | Euclidean distance         |
|                    | Human influence index                  |       | hii      | Y  | Y  | sedac.ciesin.columbia.edu/ |

Note: Y indicates the used variable.

**Table S3.** List of species, conservation status according to the IUCN, CITES and PCC, and the number of detection sites and records for Galliformes in the QMNNR of Northwestern China from August 2017 to August 2020.

| Common name                 | Scientific name                  | Conservation status |                    |                  | Numbers of Camera Sites Captured [Detection records] |          |         |       |         |         |
|-----------------------------|----------------------------------|---------------------|--------------------|------------------|------------------------------------------------------|----------|---------|-------|---------|---------|
|                             |                                  | IUCN <sup>1</sup>   | CITES <sup>2</sup> | PCC <sup>3</sup> | QF                                                   | LCH      | SDL     | MC    | XYH     | HX      |
| Blue Eared Pheasant         | <i>Crossoptilon auritum</i> *    | LC                  |                    | II               | 11 [127]                                             | 11 [107] | 13 [59] | 1 [8] | 13 [85] | 20 [99] |
| Blood Pheasant              | <i>Ithaginis cruentus</i>        | LC                  | II                 | II               | —                                                    | —        | 7 [56]  | —     | 5 [5]   | 6 [45]  |
| Chinese Grouse              | <i>Tetrastes sewerzowi</i> *     | NT                  |                    | I                | —                                                    | —        | 3 [7]   | —     | 2 [7]   | 4 [20]  |
| Chestnut-throated Partridge | <i>Tetraophasis obscurus</i> *   | LC                  |                    | I                | —                                                    | —        | 4 [15]  | —     | —       | 4 [11]  |
| Chukar Partridge            | <i>Alectoris chukar</i>          | LC                  |                    |                  | 4 [7]                                                | —        | 1 [7]   | —     | —       | —       |
| Himalayan Snowcock          | <i>Tetraogallus himalayensis</i> | LC                  |                    | II               | 5 [10]                                               | —        | —       | —     | —       | —       |
| Tibetan Snowcock            | <i>Tetraogallus tibetanus</i>    | LC                  | I                  | II               | —                                                    | 1 [1]    | 1 [1]   | —     | —       | —       |
| Tibetan Partridge           | <i>Perdix hodgsoniae</i>         | LC                  |                    |                  | —                                                    | 1 [1]    | —       | —     | —       | —       |

Note: The “\*” represents endemic to China.

<sup>1</sup>The IUCN is recorded by the website [www.iucnredlist.org/](http://www.iucnredlist.org/) (VU vulnerable, NT near threatened, LC least concern) (IUCN 2021).

<sup>2</sup>The CITES is recorded by the website of [checklist.cites.org/](http://checklist.cites.org/).

<sup>3</sup>The full name of the PCC is the protection class in China (<http://www.forestry.gov.cn>).

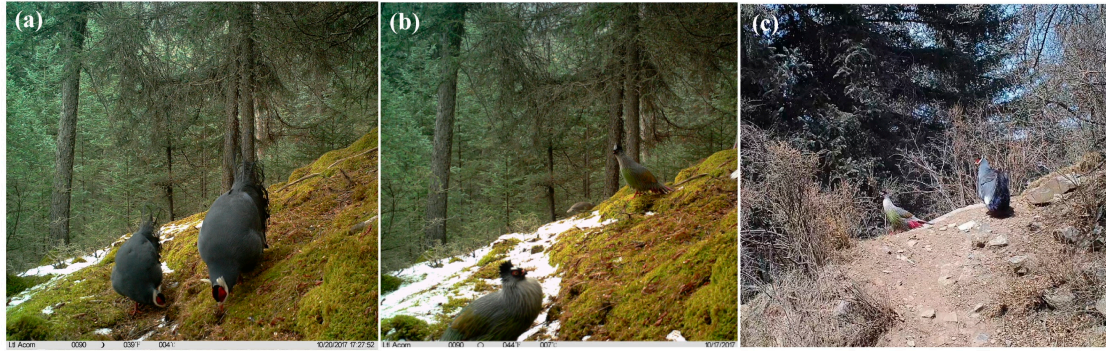

**Figure S1.** Two sympatric pheasant species captured by camera traps in the QMNNR of Northwestern China. Photographs of (a) EP and (b) BP foraging in the same site during late breeding period. (c) The co-occurrence photograph of both species in the same frame.

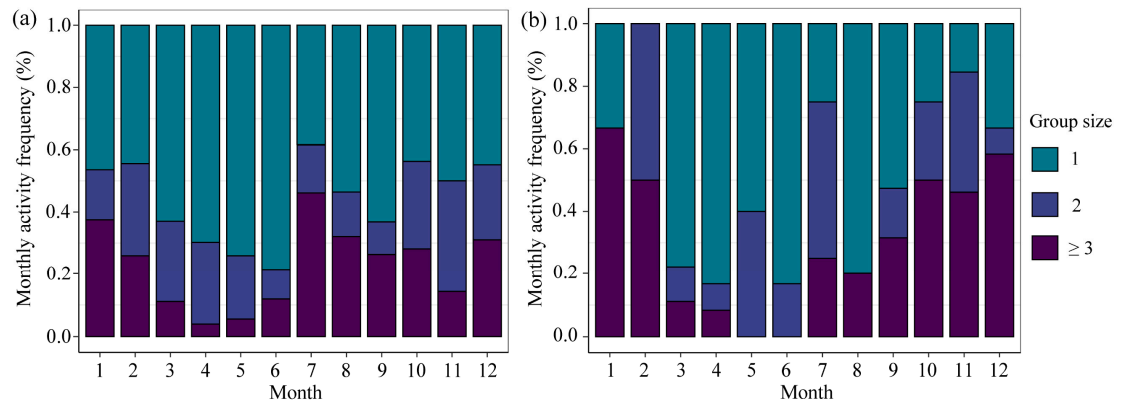

**Figure S2.** Monthly variation in the number of detected group sizes for (a) EP and (b) BP based on detection records captured by camera traps in the QMNNR of Northwestern China from August 2017 to August 2020.

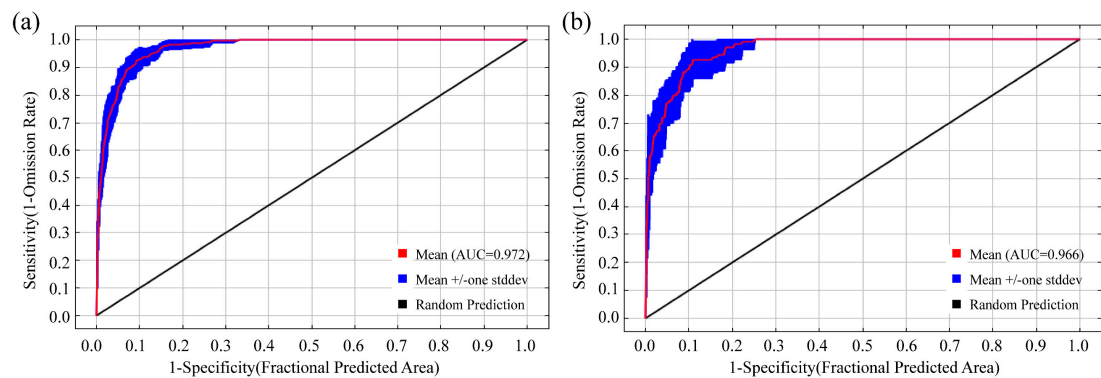

**Figure S3.** Model performance based on the area under the curve (AUC) for (a) EP and (b) BP.
